# Supplementary material for: Hsp40/70/110 chaperones adapt nuclear protein quality control to serve cytosolic clients
Source: PubMed Central journal article supplement — J Cell Biol. 2018 Jun 4;217(6):2019–32. doi: 10.1083/jcb.201706091 (PMC5987712; doi:10.1083/jcb.201706091), 2018-06-04
Supplement: JCB_201706091_sm.pdf [file JCB_201706091_sm.pdf]

## Supplemental material

Prasad et al., <https://doi.org/10.1083/jcb.201706091>

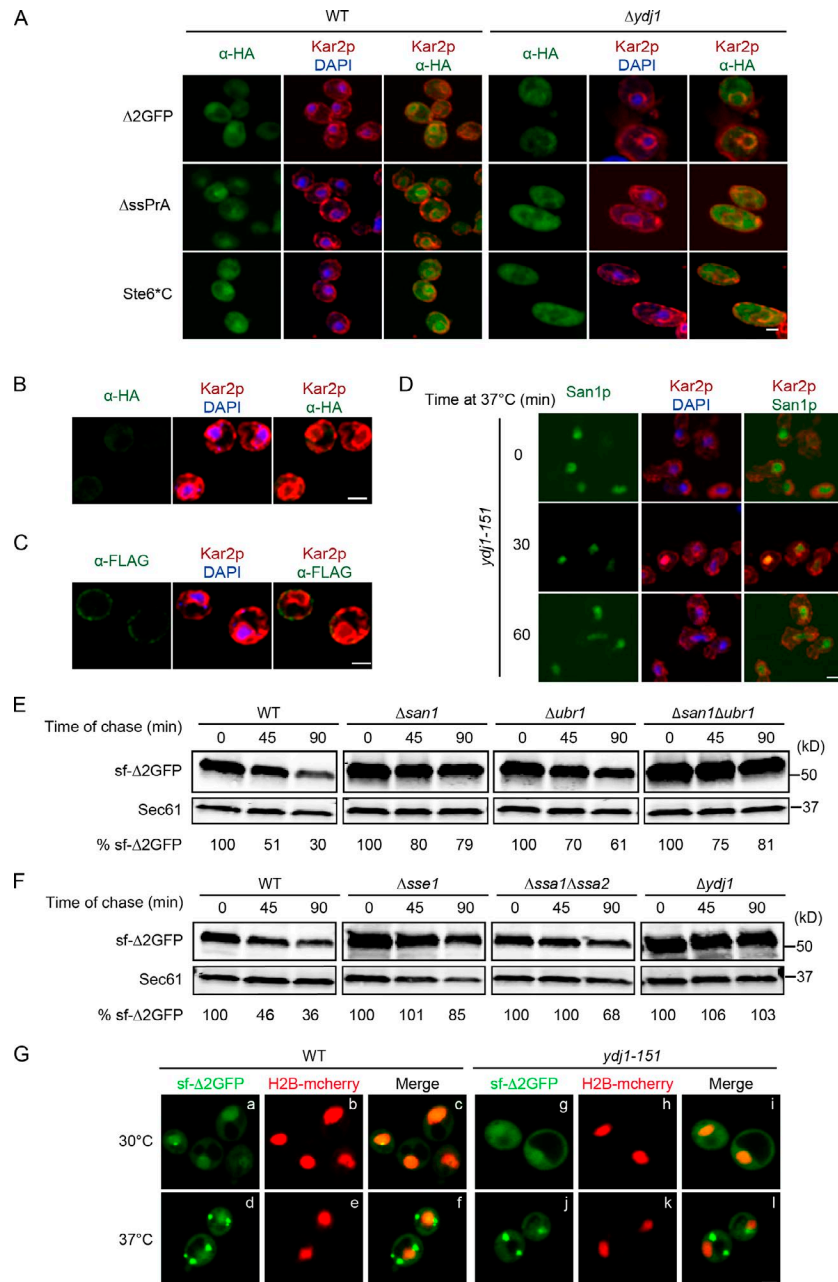

Figure S1. **Substrate imaging and dynamics.** (A) Intracellular localization of  $\Delta$ 2GFP,  $\Delta$ ssPrA, and Ste6\**C* in WT and *Δyjd1* cells. WT and *Δyjd1* cells expressing  $\Delta$ 2GFP,  $\Delta$ ssPrA, or Ste6\**C* were grown to log phase at 30°C and prepared for immunostaining as described in Fig. 2.  $\Delta$ 2GFP,  $\Delta$ ssPrA, or Ste6\**C* were detected using anti-HA antibody (green channel), ER/nuclear envelope was visualized by anti-Kar2 antibody (red channel), and nuclei were marked by DAPI staining (purple channel). (B and C) WT cells expressing empty vector were probed with anti-HA (B) and anti-FLAG (C) antibodies (green channel). ER membranes were visualized using Kar2 antibody (red channel), and nuclei were labeled by DAPI staining (purple channel). (D) Intracellular localization of San1 in *yjd1-151* cells. *yjd1-151* cells expressing San1-V5 were grown at room temperature and shifted to 37°C for as time indicated. After fixation, cells were subjected to immunostaining as described in Fig. 2. Cellular localization of San1 was visualized by anti-V5 antibody staining (green channel). ER membranes were visualized using Kar2 antibody (red channel), and nuclei were labeled by DAPI staining (purple channel). (E and F) sf- $\Delta$ 2GFP is a CytoQC substrate. Cycloheximide decay experiments were performed in WT, *Δsan1*, *Δubr1*, *Δsan1Δubr1*, *Δsse1*, *Δssa1Δssa2*, and *Δyjd1* cells expressing sf- $\Delta$ 2GFP. Cycloheximide was added to 200  $\mu$ g/ml to initiate the chase, and cells were collected at the times indicated. Total protein extracts were prepared by TCA precipitation, and a portion of each lysate was resolved by SDS-PAGE. Quantitative immunoblotting was performed to determine the protein level over the chase. (G) Localization of sf- $\Delta$ 2GFP in WT and *yjd1-151* cells was determined by confocal microscopy at the indicated temperature. HTB2-mCherry marks the position of nuclei. Bars, 2  $\mu$ m.

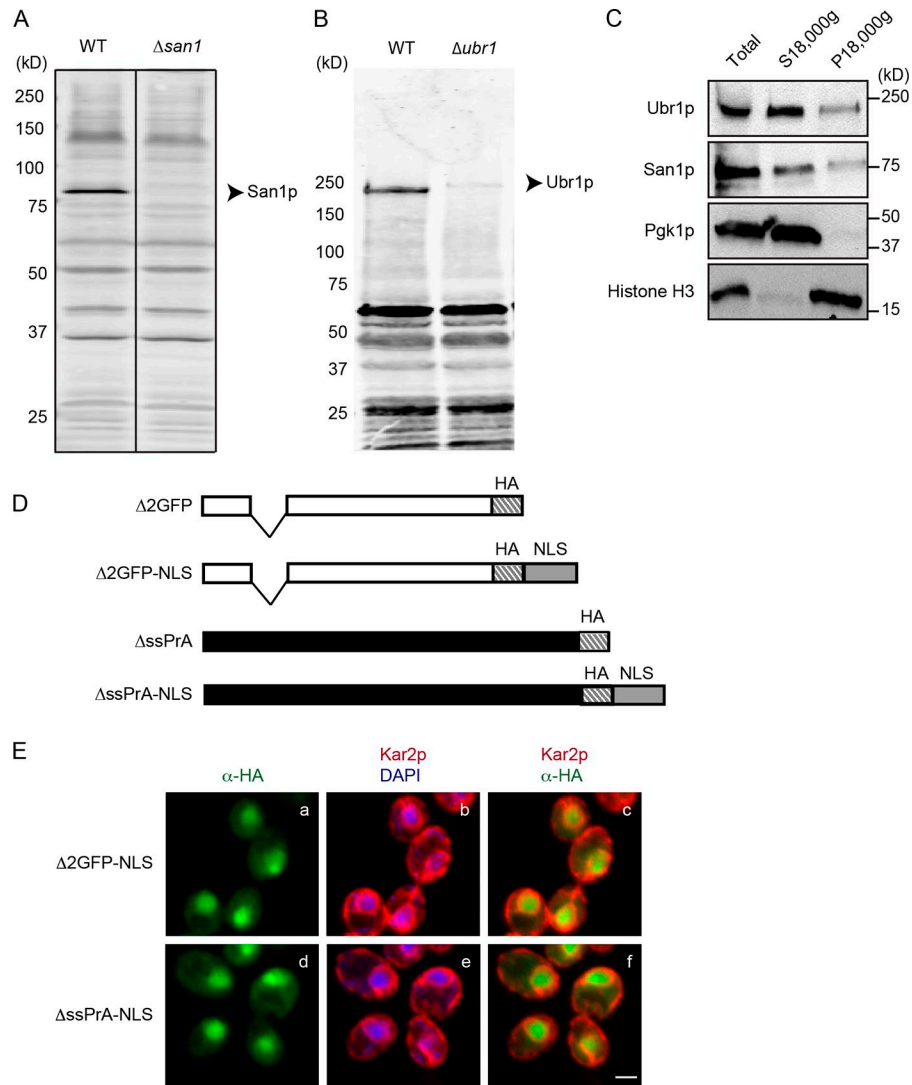

Figure S2. **Characterization of Ubr1 and San1 localization by conventional subcellular fractionation and schematic representation of NLS-tagged misfolded proteins along with their localization in WT cells.** (A and B) Total protein extract prepared from WT,  $\Delta san1$ , and  $\Delta ubr1$  cells and analyzed by immunoblotting with anti-San1 and anti-Ubr1 antibodies. The black line indicates that intervening lanes have been spliced out. (C) WT cells were disrupted by vortexing using zirconium beads, and the lysates were fractionated by differential centrifugation. The unbroken cells were removed by low-speed centrifugation at 300 g for 5 min. The supernatant was saved as total fraction and subjected to a subsequent high-speed centrifugation at 18,000 g to separate membrane fraction (designated as P18,000 g) and cytosol (designated as S18,000 g). Equal portions of each fraction were analyzed by immunoblotting with various antibodies. Antibodies against Ubr1, San1 (nuclear protein), Pgk1 (cytosolic protein), and histone H3 (nuclear protein) were used. (D) Schematic representation of NLS-tagged misfolded proteins. (E) Cellular localization of  $\Delta 2GFP-NLS$  or  $\Delta ssPrA-NLS$  in WT cells was examined by immunostaining.  $\Delta 2GFP-NLS$  and  $\Delta ssPrA-NLS$  were stained using anti-HA antibody (green channel). ER membranes were labeled using anti-Kar2 antibody (red channel), and nuclei were marked by DAPI staining (purple channel). Bar, 2  $\mu m$ .

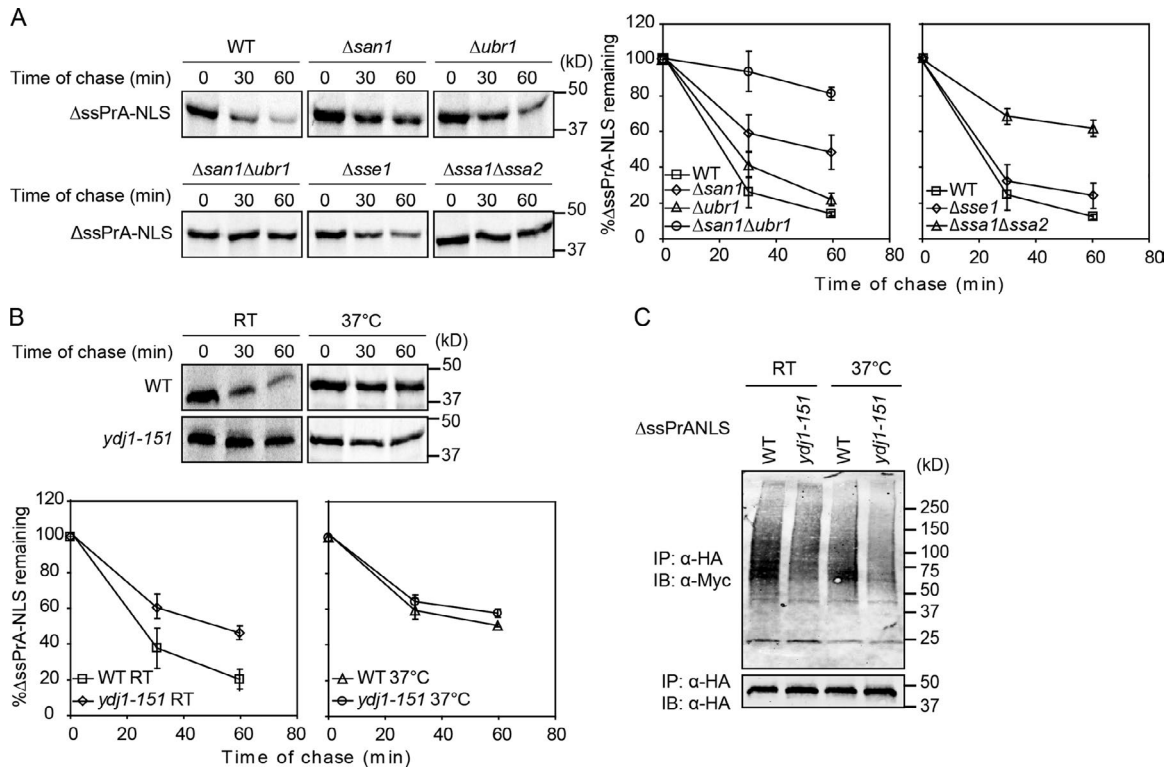

Figure S3. **Analysis of  $\Delta ssPrA-NLS$  degradation dependency. (A and B)** Turnover of  $\Delta ssPrA-NLS$  in WT,  $\Delta san1$ ,  $\Delta ubr1$ ,  $\Delta san1\Delta ubr1$ ,  $\Delta ssa1\Delta ssa2$ ,  $\Delta sse1$ , and *ydj1-151* was determined by pulse-chase analysis as described in Fig. 5 (A and B). All data plotted were processed using Excel, reflecting three independent experiments with means and SD indicated. **(C)** Ubiquitination of  $\Delta ssPrA-NLS$  in WT or *ydj1-151* cells was examined as described in Fig. 1 B. IB, immunoblot; IP, immunoprecipitation.

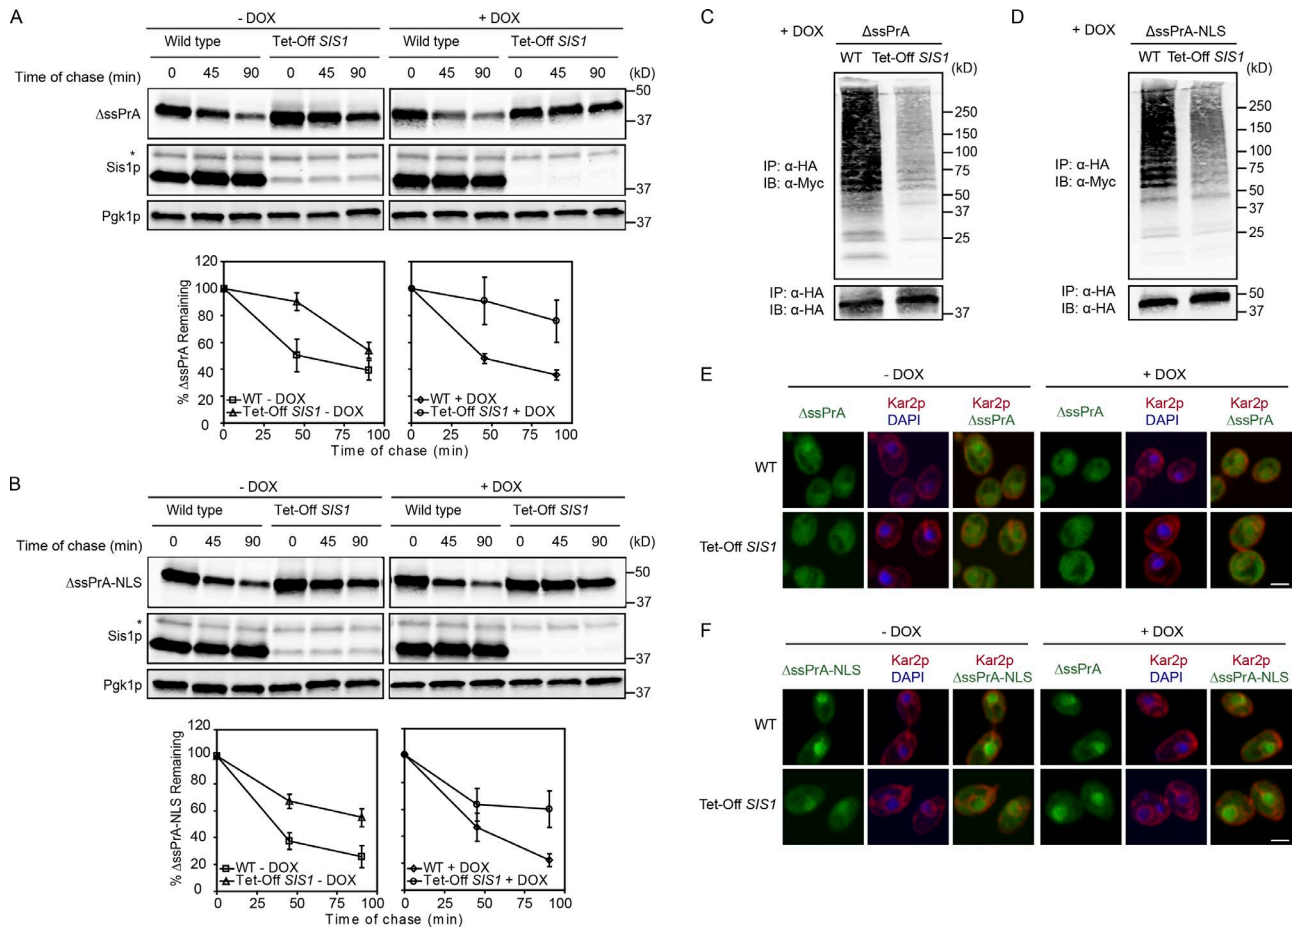

Figure S4. **Sis1** is required for CytoQC and nuclear QC but dispensable for  $\Delta$ ssPrA nuclear import. **(A and B)** Cycloheximide decay experiments were performed in WT cells (R1158) and Tet-Off *SIS1* cells expressing  $\Delta$ ssPrA or  $\Delta$ ssPrA-NLS in the absence and presence of doxycycline (DOX; 10  $\mu$ g/ml) as described in Fig. 6 A. All data plotted were processed using Excel, reflecting three independent experiments with means and SD indicated. **(C and D)** The ubiquitination of  $\Delta$ ssPrA or  $\Delta$ ssPrA-NLS in WT and Tet-Off *SIS1* cells was examined as described in Fig. 6 C. IB, immunoblot; IP, immunoprecipitation. **(E and F)** Intracellular localization of  $\Delta$ ssPrA or  $\Delta$ ssPrA-NLS in WT and Tet-Off *SIS1* cells was determined by indirect immunostaining as described in Fig. 6 E. Asterisks indicate the position of a nonspecific band. Bars, 2  $\mu$ m.

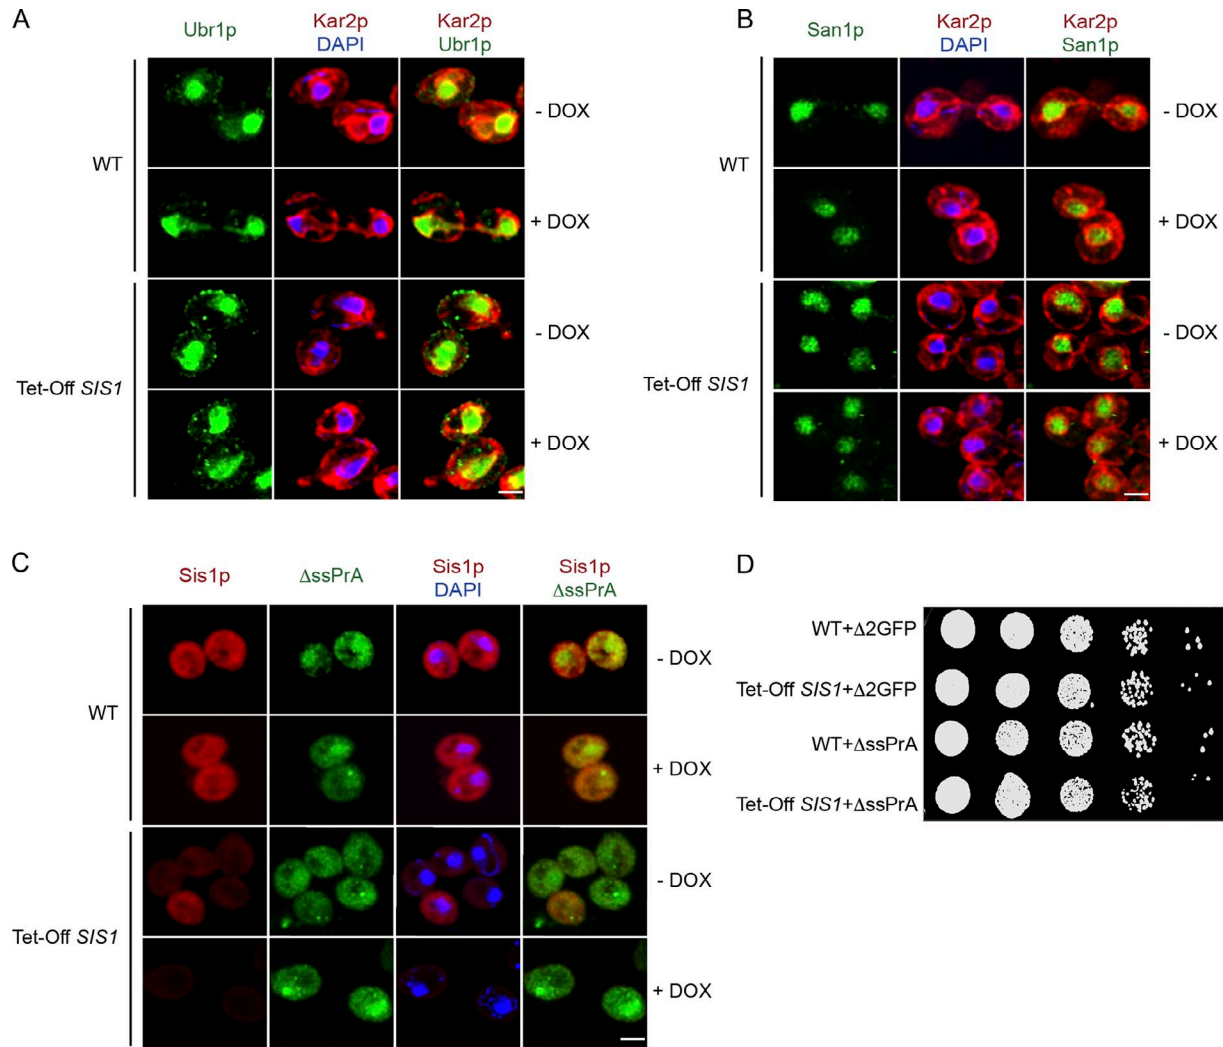

Figure S5. **Localization of Ubr1 and San1 is intact in Tet-OFF *SIS1* strains.** (A–C) Intracellular localization of Ubr1, San1, and Sis1 in WT and Tet-Off *SIS1* cells was determined by indirect immunostaining as described in Fig. 6 E. Bars, 2  $\mu$ m. (D) Equal concentrations of WT and Tet-Off *SIS1* cells were serially diluted 10-fold and spotted onto Synthetic Complete plates and incubated at 30°C for ~2 d until colonies were formed.

Table S1. **Strains used in this study**

| Strain                  | Genotype                                                                                                                  | Source               |
|-------------------------|---------------------------------------------------------------------------------------------------------------------------|----------------------|
| W303                    | <i>MATa, leu2-3,112, his3-11, trp1-1, ura3-1, can1-100, ade2-1</i>                                                        | P. Walter            |
| ACY17b                  | <i>MATa, ade2-1, his3-1,1 leu2-3,112 ura3-1, trp1-,1 can 1-100, ydj1-2::HIS3, LEU2::ydj1-151, W303 background</i>         | Caplan et al. (1992) |
| R1158                   | <i>MATa,URA3::CMV-tTA, his3-1 leu2-0 met15-0, BY4741 background</i>                                                       | Open Biosystem       |
| TH_7868 (Tet- OFF-SIS1) | <i>MATa,URA3::CMV-tTA, his3-1 leu2-0 met15-0, R1158 pSIS1::KanRTetO7TATA, BY4741 background</i>                           | Open Biosystem       |
| RPY145                  | <i>MATa, pRP22, W303 background</i>                                                                                       | Prasad et al. (2012) |
| RPY205                  | <i>MATa, pRP42, W303 background</i>                                                                                       | Prasad et al. (2010) |
| RPY206                  | <i>MATa, pRP44, W303 background</i>                                                                                       | Prasad et al. (2012) |
| RPY301                  | <i>MATa, ydj1::KANMX, pRP42, W303 background</i>                                                                          | Prasad et al. (2010) |
| RPY302                  | <i>MATa, ydj1::KANMX, pRP44, W303 background</i>                                                                          | Prasad et al. (2010) |
| RPY368                  | <i>MATa, ydj1::KANMX, pRP22, W303 background</i>                                                                          | Prasad et al. (2012) |
| RPY450                  | <i>MATa, pRP88, W303 background</i>                                                                                       | This study           |
| RPY451                  | <i>MATa, pRP86, W303 background</i>                                                                                       | This study           |
| RPY585                  | <i>MATa, ade2-1, his3-1,1 leu2-3,112 ura3-1, trp1-,1 can 1-100, ydj1-2::HIS3, LEU2::ydj1-151, W303 background</i>         | This study           |
| RPY589                  | <i>MATa, pSK146, W303 background</i>                                                                                      | This study           |
| RPY596                  | <i>MATa, ade2-1, his3-1,1 leu2-3,112 ura3-1, trp1-,1 can 1-100, ydj1-2::HIS3, LEU2::ydj1-151, pSK146, W303 background</i> | This study           |
| RPY655                  | <i>MATa, ade2-1, his3-1,1 leu2-3,112 ura3-1, trp1-,1 can 1-100, ydj1-2::HIS3, LEU2::ydj1-151, pRP86, W303 background</i>  | This study           |
| RPY656                  | <i>MATa, ade2-1, his3-1,1 leu2-3,112 ura3-1, trp1-,1 can 1-100, ydj1-2::HIS3, LEU2::ydj1-151, pRP88, W303 background</i>  | This study           |
| RPY657                  | <i>MATa, ade2-1, his3-1,1 leu2-3,112 ura3-1, trp1-,1 can 1-100, ydj1-2::HIS3, LEU2::ydj1-151, pRP92, W303 background</i>  | This study           |
| RPY658                  | <i>MATa, ade2-1, his3-1,1 leu2-3,112 ura3-1, trp1-,1 can 1-100, ydj1-2::HIS3, LEU2::ydj1-151, pRP93, W303 background</i>  | This study           |
| RPY667                  | <i>MATa, URA3::CMV-tTA, his3-1 leu2-0 met15-0, pRP44, BY4741 background</i>                                               | This study           |
| RPY668                  | <i>MATa, URA3::CMV-tTA, his3-1 leu2-0 met15-0, R1158 pSIS1::KanRTetO7TATA, pRP44, BY4741 background</i>                   | This study           |
| RPY669                  | <i>MATa, URA3::CMV-tTA, his3-1 leu2-0 met15-0, pRP42, BY4741 background</i>                                               | This study           |
| RPY670                  | <i>MATa, URA3::CMV-tTA, his3-1 leu2-0 met15-0, R1158 pSIS1::KanRTetO7TATA, pRP42, BY4741 background</i>                   | This study           |
| RPY671                  | <i>MATa, URA3::CMV-tTA, his3-1 leu2-0 met15-0, pRP90, BY4741 background</i>                                               | This study           |
| RPY672                  | <i>MATa, URA3::CMV-tTA, his3-1 leu2-0 met15-0, R1158 pSIS1::KanRTetO7TATA, pRP90, BY4741 background</i>                   | This study           |
| RPY673                  | <i>MATa, URA3::CMV-tTA, his3-1 leu2-0 met15-0, pRP91, BY4741 background</i>                                               | This study           |
| RPY674                  | <i>MATa, URA3::CMV-tTA, his3-1 leu2-0 met15-0, R1158 pSIS1::KanRTetO7TATA, pRP91, BY4741 background</i>                   | This study           |
| RPY675                  | <i>MATa, URA3::CMV-tTA, his3-1 leu2-0 met15-0, pRP44 and pRP84, BY4741 background</i>                                     | This study           |
| RPY676                  | <i>MATa, URA3::CMV-tTA, his3-1 leu2-0 met15-0, R1158 pSIS1::KanRTetO7TATA, pRP44 and pRP84, BY4741 background</i>         | This study           |
| RPY677                  | <i>MATa, URA3::CMV-tTA, his3-1 leu2-0 met15-0, pRP42 and pRP84, BY4741 background</i>                                     | This study           |
| RPY678                  | <i>MATa, URA3::CMV-tTA, his3-1 leu2-0 met15-0, R1158 pSIS1::KanRTetO7TATA, pRP42 and pRP84, BY4741 background</i>         | This study           |
| RPY679                  | <i>MATa, URA3::CMV-tTA, his3-1 leu2-0 met15-0, pRP90 and pRP84, BY4741 background</i>                                     | This study           |
| RPY680                  | <i>MATa, URA3::CMV-tTA, his3-1 leu2-0 met15-0, R1158 pSIS1::KanRTetO7TATA, pRP90 and pRP84, BY4741 background</i>         | This study           |
| RPY681                  | <i>MATa, URA3::CMV-tTA, his3-1 leu2-0 met15-0, pRP91 and pRP84, BY4741 background</i>                                     | This study           |

| Strain | Genotype                                                                                                                             | Source     |
|--------|--------------------------------------------------------------------------------------------------------------------------------------|------------|
| RPY682 | <i>MATa, URA3::CMV-tTA, his3-1 leu2-0 met15-0, R1158 pSIS1::KanRTetO7TATA, pRP91 and pRP84, BY4741 background</i>                    | This study |
| RPY683 | <i>MATa, pRP120, W303 background</i>                                                                                                 | This study |
| RPY684 | <i>MATa, ade2-1, his3-1,1 leu2-3,112 ura3-1, trp1-,1 can 1-100, ydj1-2::HIS3, LEU2::ydj1-151, pRP120, W303 background</i>            | This study |
| RPY685 | <i>MATa, pRP120 and YEp105, W303 background</i>                                                                                      | This study |
| RPY686 | <i>MATa, ade2-1, his3-1,1 leu2-3,112 ura3-1, trp1-,1 can 1-100, ydj1-2::HIS3, LEU2::ydj1-151, pRP120 and YEp105, W303 background</i> | This study |
| RPY688 | <i>MATa, pRP92, W303 background</i>                                                                                                  | This study |
| RPY689 | <i>MATa, ssa1::KANMX, ssa2::KANMX, pRP92, W303 background</i>                                                                        | This study |
| RPY690 | <i>MATa, pRP93, W303 background</i>                                                                                                  | This study |
| RPY691 | <i>MATa, ssa1::KANMX, ssa2::KANMX, pRP93, W303 background</i>                                                                        |            |
| RPY692 | <i>MATa, pRP92 and YEp105, W303 background</i>                                                                                       | This study |
| RPY693 | <i>MATa, ade2-1, his3-1,1 leu2-3,112 ura3-1, trp1-,1 can 1-100, ydj1-2::HIS3, LEU2::ydj1-151, pRP92 and YEp105, W303 background</i>  | This study |
| RPY694 | <i>MATa, pRP93 and YEp105, W303 background</i>                                                                                       | This study |
| RPY695 | <i>MATa, ade2-1, his3-1,1 leu2-3,112 ura3-1, trp1-,1 can 1-100, ydj1-2::HIS3, LEU2::ydj1-151, pRP93 and YEp105, W303 background</i>  | This study |
| RPY696 | <i>MATa, pRP94, W303 background</i>                                                                                                  | This study |
| RPY699 | <i>MATa, pRP86 and YEp105, W303 background</i>                                                                                       | This study |
| RPY700 | <i>MATa, ade2-1, his3-1,1 leu2-3,112 ura3-1, trp1-,1 can 1-100, ydj1-2::HIS3, LEU2::ydj1-151, pRP86 and YEp105, W303 background</i>  | This study |
| RPY701 | <i>MATa, pRP88 and YEp105, W303 background</i>                                                                                       | This study |
| RPY702 | <i>MATa, ade2-1, his3-1,1 leu2-3,112 ura3-1, trp1-,1 can 1-100, ydj1-2::HIS3, LEU2::ydj1-151, pRP88 and YEp105, W303 background</i>  | This study |
| RPY703 | <i>MATa, pRP97 and pRP103, W303 background</i>                                                                                       | This study |
| RPY704 | <i>MATa, ade2-1, his3-1,1 leu2-3,112 ura3-1, trp1-,1 can 1-100, ydj1-2::HIS3, LEU2::ydj1-151, pRP97 and pRP103, W303 background</i>  | This study |
| RPY706 | <i>MATa, san1::KANMX, pRP92, W303 background</i>                                                                                     | This study |
| RPY707 | <i>MATa, ubr1::KANMX, pRP92, W303 background</i>                                                                                     | This study |
| RPY708 | <i>MATa, san1::KANMX, ubr1::KANMX, pRP92, W303 background</i>                                                                        | This study |
| RPY709 | <i>MATa, sse1::KANMX, pRP92, W303 background</i>                                                                                     | This study |
| RPY710 | <i>MATa, san1::KANMX, pRP93, W303 background</i>                                                                                     | This study |
| RPY711 | <i>MATa, ubr1::KANMX, pRP93, W303 background</i>                                                                                     | This study |
| RPY712 | <i>MATa, san1::KANMX, ubr1::KANMX, pRP93, W303 background</i>                                                                        | This study |
| RPY713 | <i>MATa, sse1::KANMX, pRP93, W303 background</i>                                                                                     | This study |
| RPY714 | <i>MATa, pRP61 and pKW431, W303 background</i>                                                                                       | This study |
| RPY718 | <i>MATa, pRP96, W303 background</i>                                                                                                  | This study |
| RPY719 | <i>MATa, san1::KANMX, pRP96, W303 background</i>                                                                                     | This study |
| RPY720 | <i>MATa, ubr1::KANMX, pRP96, W303 background</i>                                                                                     | This study |
| RPY721 | <i>MATa, san1::KANMX, ubr1::KANMX, pRP96, W303 background</i>                                                                        | This study |
| RPY722 | <i>MATa, sse1::KANMX, pRP96, W303 background</i>                                                                                     | This study |
| RPY723 | <i>MATa, ssa1::KANMX, ssa2::KANMX, pRP96, W303 background</i>                                                                        | This study |
| RPY724 | <i>MATa, ydj1::KANMX, pRP96, W303 background</i>                                                                                     | This study |
| CXY351 | <i>MATa, sse1::KANMX, pRP97, pRP103 W303 background</i>                                                                              | This study |

Table S2. **Plasmids used in this study**

| Plasmid | Encoded protein        | Promoter    | Vector              | Source                                                     |
|---------|------------------------|-------------|---------------------|------------------------------------------------------------|
| pRP22   | Ste6 <sup>*</sup> C-HA | <i>TDH3</i> | pRS313 <sup>*</sup> | Ng Laboratory plasmid collection                           |
| pRP42   | ΔssPrA-HA              | <i>TDH3</i> | pRS313 <sup>*</sup> | Ng Laboratory plasmid collection                           |
| pRP42   | Δ2GFP-HA               | <i>TDH3</i> | pRS313 <sup>*</sup> | Ng Laboratory plasmid collection                           |
| pRP61   | GFP                    | <i>TDH3</i> | pRS313 <sup>*</sup> | Ng Laboratory                                              |
| pRP86   | Δ2GFP-HA               | <i>TDH3</i> | pRS316 <sup>*</sup> | This study                                                 |
| pRP88   | ΔssPrA-HA              | <i>TDH3</i> | pRS316 <sup>*</sup> | This study                                                 |
| pRP90   | Δ2GFP-HA-NLS           | <i>TDH3</i> | pRS313 <sup>*</sup> | This study                                                 |
| pRP91   | ΔssPrA-HA-NLS          | <i>TDH3</i> | pRS313 <sup>*</sup> | This study                                                 |
| pRP92   | Δ2GFP-HA-NLS           | <i>TDH3</i> | pRS316 <sup>*</sup> | This study                                                 |
| pRP93   | ΔssPrA-HA-NLS          | <i>TDH3</i> | pRS316 <sup>*</sup> | This study                                                 |
| pRP94   | FLAG-Ubr1              | <i>ADH1</i> | Yeplac181           | A. Varshavsky (Du et al., 2002)                            |
| pRP96   | Sf-Δ2GFP-HA            | <i>TDH3</i> | pRS313 <sup>*</sup> | This study                                                 |
| pRP97   | Sf-Δ2GFP-HA            | <i>TDH3</i> | pRS314 <sup>*</sup> | This study                                                 |
| pRP103  | <i>HTB2-mcherry</i>    | <i>TDH3</i> | pRS316 <sup>*</sup> | Ng Laboratory plasmid collection                           |
| YEpl105 | Myc-Ub                 | <i>CUP1</i> | YEpl105 (2μ Trp)    | M. Hochstrasser (Hochstrasser et al., 1991)                |
| pRP120  | Ste6 <sup>*</sup> C-HA | <i>TDH3</i> | pRS316 <sup>*</sup> | This study                                                 |
| pSK146  | San1-V5H6              | <i>GAL</i>  | pTS210              | Ng Laboratory plasmid collection                           |
| pAC376  | Myc-Ub                 | <i>CUP1</i> | YEpl351 (2μ Leu)    | Chellappa et al. (2001)                                    |
| pKW431  | NLS-GFP-P12            | <i>ADH1</i> | pRS426              | K. Weis (University of California, Berkeley, Berkeley, CA) |

Table S3. **Oligonucleotide primers used in this study**

| Primer | Construct | Sequence (5'-3')                                                                          |
|--------|-----------|-------------------------------------------------------------------------------------------|
| RP143  | pRP103    | CGGGATCCCGATGTCCTCTGCCCGCAAAA                                                             |
| RP145  | pRP103    | GCTCTAGAGCCTACTTGTACAGCTCGTCCATGCCG                                                       |
| RP163  | pRP90     | CCCATATGATGTTCCAGATTACGCTTCACCAAAGAAGAAGCGTAAGGTAGAAGCATCAGGATCATAAGCTCTAGATAATCTCTGCTTTT |
| RP164  | pRP91     | CCCATATGATGTTCCAGATTACGCTTCACCAAAGAAGAAGCGTAAGGTAGAAGCATCAGGATCATGATCCCCCTAGATAATCTCTGCT  |

## References

- Caplan, A.J., D.M. Cyr, and M.G. Douglas. 1992. YDJ1p facilitates polypeptide translocation across different intracellular membranes by a conserved mechanism. *Cell*. 71:1143–1155. [https://doi.org/10.1016/S0092-8674\(05\)80063-7](https://doi.org/10.1016/S0092-8674(05)80063-7)
- Chellappa, R., P. Kandasamy, C.S. Oh, Y. Jiang, M. Vemula, and C.E. Martin. 2001. The membrane proteins, Spt23p and Mga2p, play distinct roles in the activation of *Saccharomyces cerevisiae* OLE1 gene expression. Fatty acid-mediated regulation of Mga2p activity is independent of its proteolytic processing into a soluble transcription activator. *J. Biol. Chem.* 276:43548–43556. <https://doi.org/10.1074/jbc.M107845200>
- Du, F., F. Navarro-Garcia, Z. Xia, T. Tasaki, and A. Varshavsky. 2002. Pairs of dipeptides synergistically activate the binding of substrate by ubiquitin ligase through dissociation of its autoinhibitory domain. *Proc. Natl. Acad. Sci. USA.* 99:14110–14115. <https://doi.org/10.1073/pnas.172527399>
- Hochstrasser, M., M.J. Ellison, V. Chau, and A. Varshavsky. 1991. The short-lived MAT alpha 2 transcriptional regulator is ubiquitinated in vivo. *Proc. Natl. Acad. Sci. USA.* 88:4606–4610. <https://doi.org/10.1073/pnas.88.11.4606>
- Prasad, R., S. Kawaguchi, and D.T. Ng. 2010. A nucleus-based quality control mechanism for cytosolic proteins. *Mol. Biol. Cell.* 21:2117–2127. <https://doi.org/10.1091/mbc.E10-02-0111>
- Prasad, R., S. Kawaguchi, and D.T. Ng. 2012. Biosynthetic mode can determine the mechanism of protein quality control. *Biochem. Biophys. Res. Commun.* 425:689–695. <https://doi.org/10.1016/j.bbrc.2012.07.080>
